# Supplementary material for: Estrogen signaling in arcuate Kiss1 neurons suppresses a sex-dependent female circuit promoting dense strong bones
Source: PubMed Central journal article supplement (PMC6329772; doi:10.1038/s41467-018-08046-4), 2019-01-11
Supplement: 41467_2018_8046_MOESM4_ESM.pdf [file 41467_2018_8046_MOESM4_ESM.pdf]

## Description of Additional Supplementary Files

**File Name:** Supplementary Data File 1

**Description:** DEGs in bone marrow of Esr1Nkx2-1Cre females

**File Name:** Supplementary Data File 2

**Description:** DEGs in microdissected ARC of Esr1Nkx2-1Cre females.
